1 **Title:** Macroevolutionary diversity of traits and genomes in the model yeast genus  
2 *Saccharomyces*

3 **Authors:** David Peris<sup>1,2,3,4\*</sup>, Emily J. Ubbelohde<sup>1,4</sup>, Meihua Christina Kuang<sup>1</sup>, Jacek  
4 Kominek<sup>1,4</sup>, Quinn K. Langdon<sup>1</sup>, Marie Adams<sup>5</sup>, Justin A. Koshalek<sup>5</sup>, Amanda Beth  
5 Hulfachor<sup>1,4</sup>, Dana A. Opulente<sup>1,4</sup>, David J. Hall<sup>6</sup>, Katie Hyma<sup>7</sup>, Justin C. Fay<sup>7</sup>, Jean-  
6 Baptiste Leducq<sup>8,9</sup>, Guillaume Charron<sup>8</sup>, Christian R. Landry<sup>9</sup>, Diego Libkind<sup>10</sup>, Carla  
7 Gonçalves<sup>1,11,12,13,14</sup>, Paula Gonçalves<sup>12</sup>, José Paulo Sampaio<sup>12</sup>, Qi-Ming Wang<sup>1,15</sup>, Feng-  
8 Yan Bai<sup>16</sup>, Russel L. Wrobel<sup>1,4</sup>, Chris Todd Hittinger<sup>1,4\*</sup>

9 **Affiliations:**

10 <sup>1</sup>Laboratory of Genetics, J. F. Crow Institute for the Study of Evolution, Wisconsin Energy  
11 Institute, Genome Center of Wisconsin, University of Wisconsin-Madison, Madison, WI ,  
12 USA.

13 <sup>2</sup>Section for Genetics and Evolutionary Biology, Department of Biosciences, University  
14 of Oslo, Oslo, Norway.

15 <sup>3</sup>Department of Food Biotechnology, Institute of Agrochemistry and Food Technology  
16 (IATA), CSIC, Valencia Spain.

17 <sup>4</sup>DOE Great Lakes Bioenergy Research Center, University of Wisconsin-Madison,  
18 Madison, WI , USA.

19 <sup>5</sup>Biotechnology Center, University of Wisconsin-Madison, Madison, WI , USA.

20 <sup>6</sup>University of Utrecht, Utrecht, The Netherlands.

21 <sup>7</sup>Department of Biology, University of Rochester, Rochester, NY, USA.

22 <sup>8</sup>Departement des Sciences Biologiques, Université de Montréal, Montreal, QC, Canada.

23 <sup>9</sup>Département de Biologie, PROTEO, Pavillon Charles-Eugène-Marchand, Institut de  
24 Biologie Intégrative et des Systèmes (IBIS), Université Laval, Quebec City, QC, Canada.

25 <sup>10</sup>Centro de Referencia en Levaduras y Tecnología Cervecera (CRELTEC), Instituto  
26 Andino Patagónico de Tecnologías Biológicas y Geoambientales (IPATEC), Consejo  
27 Nacional de Investigaciones, Científicas y Técnicas (CONICET)-Universidad Nacional  
28 del Comahue, Bariloche, Argentina.

29 <sup>11</sup>Associate Laboratory i4HB - Institute for Health and Bioeconomy, NOVA School of  
30 Science and Technology, Universidade Nova de Lisboa, Caparica, Portugal.

31 <sup>12</sup>UCIBIO-i4HB, Departamento de Ciências da Vida, Faculdade de Ciências e  
32 Tecnologia, Universidade Nova de Lisboa, Caparica, Portugal.

33 <sup>13</sup>Vanderbilt University, Department of Biological Sciences, Nashville, TN, USA.

34 <sup>14</sup>Evolutionary Studies Initiative, Vanderbilt University, Nashville, TN, USA.

35 <sup>15</sup>School of Life Sciences, Institute of Life Sciences and Green Development, Hebei  
36 University, Baoding, China.

37 <sup>16</sup>State Key Laboratory of Mycology, Institute of Microbiology, Chinese Academy of  
38 Sciences, Beijing, China.

39

40

41 **\*Corresponding authors:** E-mails: [david.perisnavarro@gmail.com](mailto:david.perisnavarro@gmail.com),

42 [cthittinger@wisc.edu](mailto:cthittinger@wisc.edu)

43 **Running title:** Genomic and phenotypic diversity of a yeast model genus

44

45 **Abstract (150 words)**

46 Species is the fundamental unit to quantify biodiversity. In recent years, the model  
47 yeast *Saccharomyces cerevisiae* has seen an increased number of studies related to its  
48 geographical distribution, population structure, and phenotypic diversity. However, seven  
49 additional species from the same genus have been less thoroughly studied, which has  
50 limited our understanding of the macroevolutionary leading to the diversification of this  
51 genus over the last 20 million years. Here, we report the geographies, hosts, substrates,  
52 and phylogenetic relationships for approximately 1,800 *Saccharomyces* strains, covering  
53 the complete genus with unprecedented breadth and depth. We generated and analyzed  
54 complete genome sequences of 163 strains and phenotyped 128 phylogenetically diverse  
55 strains. This dataset provides insights about genetic and phenotypic diversity within and  
56 between species and populations, quantifies reticulation and incomplete lineage sorting,  
57 and demonstrates how gene flow and selection have affected traits, such as galactose  
58 metabolism. These findings elevate the genus *Saccharomyces* as a model to understand  
59 biodiversity and evolution in microbial eukaryotes.

60

61 **Keywords:** yeasts, population genomics, gene flow, galactose pathway, phenotype

62

## 63 **Introduction**

64 Global climate change is expected to significantly impact biodiversity and human  
65 health <sup>1</sup>. Thus, it is increasingly important to catalog and understand the origins of  
66 biological diversity. While the species is the fundamental unit to quantify biodiversity from  
67 a biological perspective <sup>2</sup>, the study of only one or a few representatives of each species  
68 biases our understanding of the true diversity of a species <sup>3</sup>. This limitation is especially  
69 problematic when current species delineations are not in full agreement with the  
70 boundaries of gene flow or when traits vary widely within a species <sup>4</sup>. Phenotypes can  
71 vary within a species or genus due to gene flow, selection, or other evolutionary  
72 processes <sup>5</sup>. Thus, it is vital that the scientific community quantifies biodiversity and strives  
73 to understand both its ecological and evolutionary contexts.

74 Quantifying and understanding the origins of biodiversity will advance fundamental  
75 science while also identifying and prioritizing bioresources that contribute to food,  
76 medicine, fuels, and other value-added compounds<sup>2</sup>. Whole genome sequencing has  
77 empowered researcher's in this endeavor, and ongoing initiatives, such as the Earth  
78 BioGenome Project and the European Reference Genome Atlas (ERGA), envision  
79 cataloging most of the individual species on Earth <sup>6,7</sup>. Unfortunately, these studies are  
80 particularly biased toward multicellular organisms, such as insects, vertebrates, and  
81 plants, for which multiple species have been identified, geographic patterns have been  
82 described, and phenotypic traits are often visible <sup>6</sup>. In other species, such as microbial  
83 eukaryotes, macroevolutionary processes have been less thoroughly studied and  
84 received less attention for species- or genus-wide genome sequencing efforts.  
85 Nonetheless, microbial eukaryotes, such as yeasts, are great model organisms due to

86 their small genomes, ease of genetic manipulation, and large number of genes that are  
87 orthologous with multicellular eukaryotes <sup>8</sup>.

88 A major factor in the lack of quantification of eukaryotic microbes has been the  
89 influence of the hypothesis proposed by Baas Becking in 1934 and promulgated by  
90 Beijerinck that “everything is everywhere, but, the environment selects” <sup>9</sup>. Nevertheless,  
91 expanded strain isolation from the wild and genome sequencing have shown that  
92 eukaryotic microbes, like multicellular organisms, also have geographical structure <sup>10,11</sup>.  
93 While large-scale whole genome sequencing studies have investigated the evolutionary  
94 history of the model yeast *Saccharomyces cerevisiae* and its closest relative,  
95 *Saccharomyces paradoxus* <sup>12-14</sup>, the six other non-hybrid species of the genus  
96 *Saccharomyces* have been less thoroughly studied <sup>15-18</sup>. In particular, several new and  
97 diverse lineages of *Saccharomyces* have recently been delineated <sup>13,14,19-28</sup>, but the  
98 genetic and phenotypic diversities of each species have not been studied in a  
99 comparative context <sup>29</sup>, which has limited our understanding of the macroevolutionary  
100 processes driving diversification in this important genus .

101 In this study, we cover the genetic and phenotypic diversity of the model eukaryotic  
102 genus *Saccharomyces* with unprecedented breadth and depth—reporting geographies,  
103 hosts, substrates, and phylogenetic relationships for approximately 1,800  
104 *Saccharomyces* strains. We generate and analyze high-quality genome sequences for  
105 representative strains of all available phylogenetic lineages, and we sequence and  
106 phenotype more than a hundred *Saccharomyces* strains to quantify the genetic and  
107 phenotypic variation across this macroevolutionary timescale (13.3-19.3 million years <sup>30</sup>).  
108 With this global dataset, we quantify diversity and divergence within and between species

109 and populations, several types of natural reticulation events, and the influence of ecology  
110 and incomplete lineage sorting. This work elevates the genus *Saccharomyces* as a model  
111 for understanding biodiversity, population structure, and macroevolutionary processes in  
112 microbial eukaryotes. This fundamental understanding also provides a much needed  
113 framework for identifying and prioritizing key bioresources.

114

## 115 **Results**

### 116 *The Palearctic and Fagales preponderance of Saccharomyces*

117 To place newly isolated *Saccharomyces* strains in the context of existing datasets  
118 <sup>12,13,18,23-25,31-33</sup>, we partially sequenced an additional 275 COX2 and 129 COX3  
119 mitochondrial genes from key strains. In total, we analyzed the mitochondrial sequences  
120 of ~1,800 *Saccharomyces* strains isolated mostly from bark substrates (52 % of wild  
121 isolates) from multiple continents (Figure 1A,C Figure S1, S2 and Table S1). Across the  
122 genus, 85 % of wild isolates were associated with the order Fagales, which includes oak  
123 and beech trees. In contrast, 89 % of *S. cerevisiae* strains analyzed here were isolated  
124 from anthropic environments (Figure 1C, Figure S2A).

125 *Saccharomyces* mitochondrial genomes were highly polymorphic, with a large number  
126 of haplotypes inferred for COX2 (Figure 1B, 2A) and COX3 (Figure S3, Table S1). Our  
127 results indicate that the Palearctic biogeographic realm, which includes China and  
128 Europe, contained haplotypes from all species and more haplotypes than any other  
129 biogeographic realm (Figure 1B). The centrality of Palearctic COX2 haplotypes in the  
130 phylogenetic network (Figure 2A) corroborates the hypothesis that many *Saccharomyces*  
131 lineages originated in this region, particularly East Asia <sup>25,28,34,35</sup>.

132

### 133 *Genomic structural variation is common between Saccharomyces lineages*

134 From our global *Saccharomyces* collection, we sequenced and assembled 22 high-  
135 quality genomes, including representatives for each major phylogenetic lineage ([Table](#)  
136 [S2](#)); these assemblies had nearly complete chromosomes with additional unplaced  
137 scaffolds ranging from 0 to 39 ([Table S2](#)). We also included 16 previously published  
138 assemblies, one of which we substantially improved, bringing the total here to 38 high-  
139 quality genome assemblies ([Table S2](#)). In addition, we generated sixteen complete  
140 mitochondrial genome assemblies, corrected the size of the previously published  
141 *Saccharomyces jurei* mitochondrial genome<sup>18</sup>, and assembled two new 2- $\mu$ m plasmids  
142 ([Table S2](#)). Structurally, species varied by GC contents, chromosome lengths,  
143 mitochondrial genome sizes, and the synteny of nuclear and mitochondrial genomes,  
144 usually due to a modest number of translocations ([Figure S5-S8, Supplementary Note 1](#)).

145

### 146 *Analyses revealed new Saccharomyces lineages*

147 To better illuminate population-level diversity, especially for previously under-sampled  
148 species, 163 sequenced *Saccharomyces* strains were analyzed using several population  
149 and phylogenomic approaches ([Table S2](#), see [Online Material & Methods](#)). Our analyses  
150 revealed new lineages of *S. kudriavzevii* and of *S. mikatae* ([Figure S9C,D](#)); we consider  
151 yeast lineages to be clades of strains with shared ancestries that have frequently  
152 interbred, even though they are not strictly panmictic populations. Two *S. kudriavzevii*  
153 strains, originally isolated in China, belonged to a newly identified lineage ([Figure S9D](#)),  
154 but they had fewer fixed differences compared to European (EU) strains (5.5 thousand

155 SNPs) than to strains from the Asia A lineage (10.2 thousand SNPs). In haplotype and  
156 phylogenetic networks, mitochondrial gene sequences for these two strains were located  
157 between Asia A and EU haplotypes or unexpectedly close to Asia A (Figure 2A, S3,  
158 S4B,E). Interestingly, despite the geographic proximity of this lineage to Asia A, only  
159 ~12 % of the nuclear genome of these strains was more divergent from EU than from the  
160 Asia A *S. kudriavzevii* population (Table S3, Figure S9D, S10Hi-ii), suggesting that these  
161 strains are descendants of an ancestral admixture event. Specifically, large portions of  
162 their genome are most closely related to EU (~87 %), and small portions most closely  
163 related to Asia A (~12 %). Two distinct populations were revealed for *S. mikatae*, one of  
164 which (Asia A) may have up to three cryptic lineages and a large number of segregating  
165 polymorphisms (Figure S9C), possibly from lineages yet to be discovered.

166

### 167 *Differentiation and divergence of Saccharomyces lineages and species*

168 Studying all *Saccharomyces* species together, we inferred two or more populations,  
169 with an average of about 3 populations per species (Figure 3, Figure S9), except for  
170 *S. cerevisiae*, due partly to its multiple domestication events. *S. cerevisiae*, with 16 or  
171 more populations and extensive admixture<sup>13,19,25,36,37</sup>, had relatively low genetic diversity  
172 compared to other species, with an average genetic distance only slightly higher than  
173 *S. mikatae* (Figure 3C, S11I). Despite the low sequence diversity, phenotypic and  
174 ecological factors better differentiated *S. cerevisiae* into distinct lineages or populations  
175 than in the other *Saccharomyces* species (Figure S9A). In contrast, *Saccharomyces*  
176 *paradoxus* was the most diverse species (1.95 % average pairwise divergence), followed  
177 by *S. kudriavzevii* and *S. uvarum* (Figure 3C, S11I). *Saccharomyces eubayanus* likely



178 has diversity levels similar to *S. uvarum*<sup>24</sup>, but the Sichuan and West Asia lineages<sup>22</sup>  
179 were not available for genome sequencing. Each species was separated from its closest  
180 relative by a genetic divergence of ~10 % (Figure S11A-D,G-H), except for *S. arboricola*  
181 and *S. kudriavzevii* (Figure S11E,F). The differentiation among *S. kudriavzevii*,  
182 *S. arboricola*, and *S. paradoxus*, as measured by  $F_{ST}$ , was considerably lower than  
183 among the other *Saccharomyces* species (Figure S12), an indication that these three  
184 species harbor more variation that is not fixed between other members of the genus.

185 In *Saccharomyces*, levels of <85 % of amino acid identity (AAI) in a set of core single-  
186 copy eukaryotic genes differentiated species, while population-level AAI values were  
187 higher (Figure 3B). The lowest AAI value within a species was the comparison between  
188 the Asia B and EU populations of *S. kudriavzevii*, whose value was between the AAI  
189 values of the *Homo sapiens*/*Pan troglodytes* and *Homo sapiens*/*Macaca mulatta*  
190 comparisons. *Saccharomyces paradoxus* America A versus EU produced the highest AAI  
191 value (Figure 3B), which is consistent with the hypothesis that these populations were  
192 very recently derived due to migration from Europe to North America<sup>38</sup>. The minimum  
193 AAI between *Saccharomyces* species was comparable to the comparison between *Homo*  
194 *sapiens* and *Mus musculus* (<70 % AAI).

195

196 *The non-nuclear genome is more permeable to introgression and gene flow than*  
197 *the nuclear genome*

198 To explore the stability of the relationships among *Saccharomyces* populations and  
199 species, we analyzed 38 high-quality nuclear genomes of representative strains using a  
200 phylogenomic framework to investigate 3850 conserved genes. The ASTRAL coalescent

201 species tree and BUCKY concordance primary tree agreed with previous studies (Figure  
202 4A, Figure S13)<sup>15,18,28,39</sup>. Species-level branches were highly supported, while some  
203 branches close to the tips were not. Internal branch support values decreased outside of  
204 the *S. cerevisiae*-*S. paradoxus* clade and the *S. uvarum*-*S. eubayanus* clade, a  
205 phenomenon previously observed<sup>30,40</sup> and proposed to be due to hybridization involving  
206 ancestors of *S. kudriavzevii*<sup>41</sup>. Alternatively, the short coalescent units near the  
207 divergence of *S. arboricola* and *S. kudriavzevii* (Figure 4A) and the low relative  
208 differentiation of *S. arboricola* and *S. kudriavzevii* with the rest of species (Figure S12E,F)  
209 suggest a more nuanced model. Specifically, we propose that the conflicting data  
210 between genes are the result of diversification over a relatively narrow window of time,  
211 which allowed for the retention of considerable ancestral polymorphisms through  
212 incomplete lineage sorting (ILS); ancient gene flow between lineages in the early stages  
213 of speciation; or both. These patterns have been seen frequently across the tree of life<sup>42</sup>.

214 To further explore the phylogenetic stability of species boundaries, we applied  
215 reciprocal monophyly tests for each species using 3850 ML gene trees (Table S5).  
216 *Saccharomyces cerevisiae* and *S. paradoxus* only failed to be monophyletic in 17 and 57  
217 genes, respectively. Gene flow from *S. cerevisiae* to *S. paradoxus* EU and America A  
218 were detected, as previously documented<sup>43</sup>, but the most frequent source of conflict was  
219 the location of the *S. cerevisiae* CHNIX lineage. This lineage sometimes grouped as an  
220 early-diverging member of the *S. paradoxus* clade or as an outgroup to both *S. cerevisiae*  
221 and *S. paradoxus*, topologies and branch lengths that are consistent with ILS. The  
222 *S. uvarum* Australasian lineage produced an even more striking pattern, again consistent  
223 with ILS, where more than 700 genes placed it as an early-diverging lineage of the

224 *S. eubayanus* clade. At the species level, the Bayesian pipeline revealed many genes  
225 that supported alternative topologies, especially where the phylogenetic locations of  
226 *S. arboricola*, *S. kudriavzevii*, and the *S. mikatae/S. jurei* clade varied, and the consensus  
227 species tree was only supported by ~1824 genes (48 % of a total of 3801 genes for this  
228 pipeline) (Figure S13). The presence of *Kluyveromyces lactis* in the dataset for the  
229 Bayesian pipeline, which was necessary to root the tree during phylogenetic  
230 reconstruction, might have decreased the support for internal branches compared with  
231 the ML pipeline (Figure 4A).

232 This conflict can be recapitulated using phylogenetic networks reconstructed using  
233 genes in 38 high-quality genomes (Table S2, Figure S14A) annotated with the Yeast  
234 Genome Annotation Pipeline (YGAP) and using 14 BUSCO genes common to all (160  
235 strains) phenotyped and previously sequenced strains (Table S2, Figure S14B).  
236 Collectively, these results support a model of rapid radiation of some lineages with the  
237 retention of ancestral polymorphisms.

238 Within species, we observed much lower concordance factors at nodes (Figure 4A),  
239 which highlights ongoing gene flow within and between lineages. We next examined our  
240 sequenced and phenotyped strains (Table S2) for genome-wide signals of gene flow  
241 between recognized lineages (Figure S10). These analyses suggested that nuclear gene  
242 flow was infrequent. Only 9.25 % of the *Saccharomyces* strains, from five of the eight  
243 species, showed strong evidence of admixture (Figure S10, Table S3). Admixture was  
244 mostly observed in domesticated *S. cerevisiae* strains and was accompanied by higher  
245 levels of heterozygosity, which was generally low across the genus (Figure S15). The  
246 genomic contributions of the minor parental donor averaged 14.29 % (Figure 4Bi, Table

247 **S3**). The smallest values belonged to two strains of *S. paradoxus* America C with  
248 contributions from America B, which were previously named the America C\* lineage <sup>14</sup>,  
249 as well as two *S. eubayanus* strains. In the latter cases, one strain was from each  
250 Patagonian population, but it had genomic contributions from the other Patagonian  
251 population. The highest value of genomic contribution by a minor donor in our dataset  
252 was found in a South America B strain, which had 39.53 % of its genome from South  
253 America A origin (**Figure 4Bi**, **Figure S10I**). This strain also showed one of the two highest  
254 levels of heterozygosity for wild strains (**Figure S15**), further suggesting a recent  
255 admixture event. The low levels of heterozygosity for the rest of admixed strains might  
256 point to the rapid fixation of lineage-specific alleles following haploselfing, intratetrad  
257 mating, or a return-to-growth event. Although we found some evidence of gene flow  
258 between populations, rarer introgressions between species (**Figure S16**, **Table S3**, <sup>13</sup>),  
259 and considerable evidence of incomplete lineage sorting, we conclude that the  
260 phylogenies of nuclear genes were generally consistent with the accepted species  
261 relationships.

262 We next tested how the species tree compared with phylogenies generated using the  
263 mitochondrial genome. A preliminary view of mitochondrial synteny among  
264 *Saccharomyces* immediately suggested the possibility of considerable incongruence. For  
265 example, mitochondrial genome synteny is conserved in *S. cerevisiae* and *S. paradoxus*,  
266 except in the EU–America A and Far East populations of *S. paradoxus* (**Figure S7**, **S8A**,  
267 <sup>44</sup>). The *S. jurei* nuclear genome was mostly syntenic with *S. mikatae* strains (**Figure S5**),  
268 but its mitochondrial genome was syntenic with the *S. paradoxus* EU and America A  
269 populations (**Figure S8B**) and differed from the *S. mikatae* Asia A population (**Figure S7**).

270 The *S. uvarum* Australasian population and *S. eubayanus* were syntenic in both their  
271 nuclear and mitochondrial genomes (Figure S5, S8E), while the other *S. uvarum*  
272 populations inherited derived mitochondrial and nuclear rearrangements (Figure S5,  
273 S8D). At the nucleotide level, both COX2 and COX3 phylogenetic networks disagreed  
274 with the nuclear genome in some cases. In both mitochondrial phylogenetic networks,  
275 population haplotypes from some species were more closely related to other species  
276 haplotypes than to their same-species haplotypes (Figure 2A, S3) due to lineage-specific  
277 introgressions. For example, *S. paradoxus* America B and C strains were connected to  
278 *S. cerevisiae* haplotypes. Similarly, *S. eubayanus* West China and *S. uvarum*  
279 Australasian strains likely experienced introgressions. A phylogenetic network for  
280 mitochondrial genes of the 64 high-quality mitochondrial genomes (Table S2, Figure 2B),  
281 supported the broader COX2 and COX3 results (Figure 2B, Figure S4). In addition to  
282 previously detected mitochondrial introgressions between species and gene flow  
283 between populations <sup>44-47</sup>, we also detected new cases of mitochondrial introgressions  
284 and gene flow for *S. kudriavzevii*, *S. jurei*, and *S. mikatae* (Figure 4Bii, Figure S4). The  
285 *S. arboricola* and *S. kudriavzevii* mitochondrial genomes also had some affinity for the  
286 *Candida* (*Nakaseomyces*) *castellii* outgroup, as suggested by their exacerbated  
287 subtended edges in the network (Figure S4), so ancestral polymorphisms or introgression  
288 from unknown *Saccharomyces* lineages might have contributed to the mitochondrial  
289 genomes of these species. We conclude that events of introgressions and gene flow  
290 between mitochondrial genomes have been much more frequent than in the nuclear  
291 genome (Figure 4Bi, Bii).

292 Similarly, 22 interspecies transfers were detected for the 2- $\mu$ m plasmid (Figure 4Bii,  
293 Figure S17), which is also cytoplasmically inherited. The *S. cerevisiae* 2- $\mu$ m plasmid  
294 seems to be highly mobile, and we detected it in four other species. Sixteen strains had  
295 both cytoplasmic 2- $\mu$ m plasmid genes and plasmid genes that had been transferred to  
296 the nuclear genome, a phenomenon previously noted for a handful of strains <sup>48</sup> (Table  
297 S4). We also detected a transfer from a hypothesized unknown source into the  
298 *S. cerevisiae* Taiwanese lineage <sup>13</sup>, as well as to a *S. mikatae* Asia A strain and a  
299 *S. kudriavzevii* Asia A strain (Figure S17A). Given its sister relationship with the  
300 previously detected *S. kudriavzevii* 2- $\mu$ m plasmid, this unknown lineage may also be a  
301 close relative of *S. kudriavzevii* (Figure S17A). Taken together, our results suggest that  
302 introgressions and gene flow involving the nuclear genome are limited in wild  
303 environments, while introgression and gene flow involving the cytoplasmically inherited  
304 mitochondrial genome and the 2- $\mu$ m plasmid are much more frequent (Figure 4), likely  
305 because they can occur without involving karyogamy <sup>49</sup>, or be aided by the activity of free-  
306 standing homing endonucleases <sup>47,50</sup>.

307

### 308 *Complex ancestries promote phenotypic diversity*

309 To explore phenotypic variation across the genus *Saccharomyces*, we phenotyped  
310 128 of the sequenced *Saccharomyces* strains, focusing on phylogenetically distinct  
311 lineages from different species (Table S2, S6, Figure S9). We tested the ability of these  
312 strains to grow in different carbon sources, temperatures, and stresses (Supplementary  
313 Note 2). Growth characteristics varied among *Saccharomyces* species depending on the  
314 conditions tested (Figure S18-S22). Interestingly, *S. mikatae* had some of the lowest

315 genetic diversity values but had some of the highest phenotypic diversity (Figure 3C, 5A,  
316 Figure S23). In contrast, *S. eubayanus* and *S. uvarum* strains were mostly overlapping in  
317 a principal component analysis (PCA) and were less phenotypically diverse than the other  
318 species (Figure 5A, S23), indicating strains from these sister species have similar traits  
319 in the conditions tested (Figure 5A, Figure S24A,C). These results highlight how  
320 phenotypically diverse the *Saccharomyces* genus is and offer new bioresources for  
321 industrial applications.

322 Temperature tolerance was an important condition (Figure S25 S26) for species  
323 differentiation (Figure 5A). *Saccharomyces eubayanus* and *S. uvarum* grew the best at  
324 lower temperatures (Figure 5B, S18, S26C-E), while *S. cerevisiae* and *S. paradoxus* grew  
325 the worst at lower temperatures and instead grew best at higher temperatures (Figure  
326 5B, S26C-E). *Saccharomyces mikatae*, *S. arboricola*, and *S. kudriavzevii* also grew well  
327 at lower temperatures, which supports the hypothesis that lower temperature growth is  
328 an ancestral trait of the genus *Saccharomyces*<sup>51,52</sup> and might influence in the ecological  
329 and geographic distribution of *Saccharomyces* lineages.

330 The utilization pathway for the sugars GALactose and MELibiose is well studied and  
331 highly variable in the genus *Saccharomyces* (Figure S27A)<sup>53-56</sup>. Making use of our  
332 diverse genomic and phenotypic dataset, we explored the ancestry of the individual genes  
333 involved in the GAL/MEL pathway (Figure S28) to determine potential genetic bases of  
334 variabilities in growth on galactose and melibiose (Figure 6A,B, S27B,C). Previous  
335 studies have observed loss-of-function mutations in some genes of the pathway in  
336 *S. cerevisiae*<sup>56,57</sup>, ancient pseudogenization of the entire GAL pathway in the *S.*  
337 *kudriavzevii* Asia A and B populations and retention of a functional pathway in the EU

338 population<sup>58,59</sup>, and ancient alleles in some *S. cerevisiae* strains whose origin predates  
339 the diversification of the genus<sup>60-63</sup>. Our new analyses here found additional variation that  
340 suggests that some of the variation in galactose or melibiose growth was the  
341 consequence of gene flow between populations of the same species or introgression  
342 between species (Figure 6A, S27B, S28). For example, two strains of *S. paradoxus* from  
343 America C with evidence of gene flow from America B population (Figure S9G) were  
344 capable of growing on melibiose, likely because they acquired an active *MEL1* gene from  
345 the America B population (Figure S27C, S28H). Introgressions for genes conferring  
346 melibiose utilization were also detected between *S. cerevisiae* and *S. paradoxus*<sup>55,57</sup>.

347 The two new admixed strains of *S. kudriavzevii* provided an even more striking  
348 example of gene flow and selection. We previously inferred long-term balancing selection  
349 based on local selection regimes for the functional genes and inactivated pseudogenes  
350 of *S. kudriavzevii*<sup>58</sup>, but the populations with inactive (Asia A and B) or active (EU) *GAL*  
351 networks were strongly differentiated by geography and population structure. Here we  
352 discovered two strains isolated from Southern China (Figure S1D, Table S2) that shared  
353 more than 87 % genome ancestry with EU strains (Figure S10H) and yet were unable to  
354 grow on galactose (Figure 6B). Phylogenetic analyses demonstrated that the loss of this  
355 trait was due to the acquisition of six *GAL* pseudogenes (at four loci: *GAL1/GAL10/GAL7*,  
356 *GAL4*, *GAL2*, and *GAL80*) from the *S. kudriavzevii* Asia A population after the  
357 diversification of EU and Asia A populations (Figure S28K). Since these two strains  
358 shared less than 12 % genome ancestry with the Asia A lineage, in the absence of  
359 selection against hybrid networks or against *GAL* activity in Asia, the odds are quite low  
360 ( $p = 0.12^4 = 0.0002$ ) that these closely related strains would have acquired pseudogenes



361 by chance at all 4 *GAL* loci that are functional in the EU population. Notably, the only two  
362 *GAL* loci not transferred from the Asia A lineage by gene flow into the ancestors of these  
363 two strains were *GAL3* and *GAL80B* (Figure S28K, Figure S10H), two pseudogenes that  
364 were inactivated in the ancestor of all known strains of *S. kudriavzevii*<sup>58</sup>.

365 The data also suggested that intricate selection dynamics may be occurring at the  
366 *GAL2* locus that are not simply qualitative. Most *S. eubayanus* and *S. uvarum* strains  
367 have a tandem duplication at the *GAL2* locus whose function is unknown<sup>17,58-60</sup>. Some  
368 *S. cerevisiae* strains from the CHNIII lineage that were isolated from milk fermentations  
369 also possess additional copies of *GAL2* whose origin predates the diversification of the  
370 genus; these strains lack functional copies of *HXT6* and *HXT7*, which encode hexose  
371 transporters, and seem to use *GAL2* to encode the transport of both galactose and  
372 glucose in dairy environments that are rich in lactose<sup>63</sup>. Some *S. eubayanus* and  
373 *S. uvarum* strains have lost the *GAL2B* gene. Despite testing several growth conditions,  
374 including various galactose concentrations, the strains lacking *GAL2B* only displayed  
375 maximum growth rate differences at 30 °C on 2 % glucose, which was lower (Wilcoxon  
376 rank-sum test,  $p$ -value =  $5.97 \times 10^{-4}$ , Figure S26F). This result suggests a similar model  
377 for the evolution of the *S. uvarum/S. eubayanus GAL2B* gene and the additional copies  
378 of *GAL2* in *S. cerevisiae*, wherein these additional copies of *GAL2* evolved to support  
379 glucose transport in specific ecological conditions. Notably, the single copies of *GAL2*  
380 from *S. eubayanus* Holarctic strains are an outgroup to the entire  
381 *S. uvarum/S. eubayanus* clade, including all known *GAL2* and *GAL2B* alleles (Figure  
382 S28B), suggesting that multiple ancient alleles are segregating at this locus due to

383 balancing selection<sup>60</sup>. Collectively, these results highlight how local selection regimes  
384 can maintain ancient polymorphisms, even in multi-locus gene networks.

385

## 386 **Discussion**

387

388 *Saccharomyces diversification within and outside of Asia in association with*  
389 *plants*

390 Several authors have postulated Asia as the geographical origin of *S. cerevisiae* and  
391 other species of *Saccharomyces*<sup>13,22,25,28,37,64,65</sup>. Our present results provide evidence to  
392 support several rounds of speciation in Asia, as well as potentially the origin of the genus  
393 itself: i) the high genomic diversity in the Palearctic biogeographic realm, which includes  
394 Asia; ii) the centrality of Palearctic mitochondrial haplotypes to the mitochondrial network;  
395 iii) and ancestral polymorphisms in Asian strains that generate phylogenetic conflict and,  
396 in some cases, such as the *GAL* loci, phenotypic differences that are likely under strong  
397 selection. The presence of ancestral polymorphisms in several populations and species  
398 suggests that *Saccharomyces* diversification was rapid<sup>66</sup>, that considerable gene flow  
399 continued prior to the generation of strong species barriers<sup>67-71</sup>, or both. The presence of  
400 all species in association with trees of the order Fagales points to the adaptation of the  
401 last common ancestor of *Saccharomyces* to these hosts. However, there is still much to  
402 learn about the ecological distribution of yeasts in general, and *Saccharomyces* in  
403 particular<sup>72</sup>, where sampling has often been biased toward bark and soil samples from  
404 Fagales. Even though most new lineages and species likely originated in Asia, our  
405 comprehensive global sampling and analyses strongly support the hypothesis that

406 several lineages originated in South America, North America, Europe, and Oceania,  
407 including lineages of *S. eubayanus*, *S. paradoxus*, *S. uvarum*, *S. jurei*, and *S. arboricola*  
408 <sup>14,21,24,26,27,31,73-75</sup> (Figure 4D). These diversifications could be accompanied by the  
409 adaptation to new hosts. For example, *S. uvarum* and *S. eubayanus* lineages are  
410 frequently isolated from fungi associated with trees of the genus *Nothafagus* in South  
411 America. This influence of related *Nothafagus* hosts during diversification might help  
412 explain the similar phenotypic traits observed among *S. uvarum* and *S. eubayanus*  
413 strains.

414 The ecological and genetic factors driving this diversification of the genus could also  
415 be linked to temperature fluctuations during the Miocene epoch, which is coincident with  
416 *Saccharomyces* divergence times <sup>30</sup>. Temperature fluctuations have played an important  
417 role in the diversification of plants <sup>76</sup> and animals <sup>77</sup>, and temperature tolerance  
418 differentiate several *Saccharomyces* species and clades. In particular, the high  
419 temperature tolerance of *S. cerevisiae* and *S. paradoxus* <sup>51,52,78</sup> seems to be a derived  
420 trait. The influence of temperature during the diversification might be one of the reasons  
421 why we observe frequent introgressions in the mitochondrial genome <sup>44-47</sup>, where species-  
422 specific mitotypes have been shown to strongly affect temperature tolerance <sup>50,79</sup>. Clear  
423 patterns of differentiation by geographic distribution and climatic conditions have also  
424 been detected for *Saccharomyces* mitotypes <sup>26,33,65,80,81</sup>.

425 The role of introgressions during lineage diversification is still under debate, but  
426 nuclear introgressions between species have been mainly observed in human-associated  
427 environments, including the horizontal gene transfer of few genes <sup>82-84</sup>, frequent  
428 admixture of domesticated *S. cerevisiae* strains <sup>13,36,62</sup>, and interspecies hybridization of

429 strains used to produce fermented beverages<sup>85-87</sup>. In contrast, cytoplasmic genetic  
430 elements have undergone extensive introgression and gene flow even in wild strains of  
431 *Saccharomyces*, as previously seen in animals<sup>88-90</sup>.

432

433 *Saccharomyces populations are often more genetically differentiated than*  
434 *multicellular eukaryotic species*

435 Multicellular eukaryotes might be more permeable to interspecies introgression<sup>91,92</sup>  
436 because animal and plant species are more closely related than species are in the genus  
437 *Saccharomyces*. The distinction is not entirely due to differences in taxonomic practice  
438 because, even when we considered phylogenetically distinct *Saccharomyces* lineages,  
439 only 9.25 % of *Saccharomyces* nuclear genomes were admixed. Spore viabilities lower  
440 than 1 %<sup>69,93</sup> in crosses between strains have been considered sufficient to define yeast  
441 species using the biological species concept alone. When combined with phylogenetic  
442 and ecological species concepts, taxonomic authorities have accepted spore viabilities  
443 lower than 10 %, as seen for *S. eubayanus* and *S. uvarum*, which have the highest AAI  
444 values among currently recognized species<sup>94,95</sup>.

445 Our comparison of AAI values with multicellular eukaryotes suggests that species  
446 designations based on spore viability and other currently used criteria do not differentiate  
447 *Saccharomyces* species as finely as the criteria deployed by plant and animal  
448 taxonomists. If they did, what we currently consider *Saccharomyces* populations or  
449 lineages might be more analogous to the species designations of multicellular eukaryotes.  
450 Even so, current yeast taxonomic practice has the advantage of recognizing the ease

451 with which genes of phenotypic importance flow between populations of the same  
452 species.

453

#### 454 *Phenotypic diversity through complex ancestries*

455 Phenotypic traits are gained and lost frequently in animals, plants, and fungi <sup>30,96-98</sup>.  
456 Alternatively, traits can be retained in a species by balancing selection when different  
457 lineages or populations maintain genes or even multi-locus gene networks encoding traits  
458 due to local adaptation or fluctuating conditions. For example, here we showed that some  
459 admixed *S. paradoxus* America C strains regained the ability to grow in melibiose by  
460 acquiring a functional *MEL1* gene from the *S. paradoxus* America B population. Even  
461 more strikingly, two admixed *S. kudriavzevii* strains, which were isolated in Asia but were  
462 more closely related to the EU population, lost the ability to grow in the presence of  
463 galactose by acquiring *GAL* pseudogenes from the Asia A population, directly  
464 demonstrating gene flow between Gal<sup>+</sup> and Gal<sup>-</sup> populations of *S. kudriavzevii* for the first  
465 time <sup>58</sup>. Recent studies concluded that *S. cerevisiae* maintained alternative higher-activity  
466 versions of the *GAL* network due to segregating variation at multiple loci <sup>60</sup>. Our new  
467 results here definitively show that qualitative variation can also segregate within a species  
468 for a multi-locus gene network, and indeed, suggest that pseudogenized genes may be  
469 preferred in some environments. We conclude that the maintenance of compatible  
470 alternative versions of gene networks, even at unlinked loci, may be more frequent than  
471 previously thought.

472

## 473 **Conclusion**

474 The model genus *Saccharomyces* and the current dataset provide an important  
475 quantitative benchmark of the boundaries of lineages, populations, and species in terms  
476 of genetic variation, phenotypic variation, and the relationship between genotype and  
477 phenotype. Setting these boundaries helps characterize eukaryotic microbial biodiversity,  
478 understand ecological dynamics, and offers bioresources of industrial interest.

479

## 480 **Acknowledgments**

481 We thank the University of Wisconsin Biotechnology Center DNA Sequencing Facility  
482 for providing Illumina and Sanger sequencing facilities and services; Maria Sardi, Audrey  
483 Gasch, and Ursula Bond for providing strains; Sean McIlwain for providing guidance for  
484 genome ultra-scaffolding; Yury V. Bukhman for discussing applications of the Growth  
485 Curve Analysis Tool (GCAT); Mick McGee for HPLC analysis; Raúl Ortíz-Merino for  
486 assistance during YGAP annotations; Jessica Leigh for assistance with PopART; Cecile  
487 Ané for suggestions about BUCKy utilization and phylogenetic network analyses; Samina  
488 Naseeb and Daniela Delneri for sharing preliminary multi-locus *Saccharomyces jurei*  
489 data; and Branden Timm, Brian Kyle, and Dan Metzger for computational assistance.  
490 Some computations were performed on Tirant III of the Spanish Supercomputing Network  
491 (“Servei d’Informàtica de la Universitat de València”) under the project BCV-2021-1-0001  
492 granted to DP, while others were performed at the Wisconsin Energy Institute and the  
493 Center for High-Throughput Computing of the University of Wisconsin-Madison. During a  
494 portion of this project, DP was a researcher funded by the European Union’s Horizon  
495 2020 research and innovation programme Marie Skłodowska-Curie, grant agreement No.

496 747775, the Research Council of Norway (RCN) grant Nos. RCN 324253 and 274337,  
497 and the Generalitat Valenciana plan GenT grant No. CIDEAGENT/2021/039. DP is a  
498 recipient of an Illumina Grant for Illumina Sequencing *Saccharomyces* strains in this  
499 study. QKL was supported by the National Science Foundation under Grant No. DGE-  
500 1256259 (Graduate Research Fellowship) and the Predoctoral Training Program in  
501 Genetics, funded by the National Institutes of Health (5T32GM007133). This material is  
502 based upon work supported in part by the Great Lakes Bioenergy Research Center,  
503 Office of Science, Office of Biological and Environmental Research under Award  
504 Numbers DE-SC0018409 and DE-FC02-07ER64494; the National Science Foundation  
505 under Grant Nos. DEB-1253634 and DEB-2110403; and the USDA National Institute of  
506 Food and Agriculture Hatch Project Number 1020204. C.T.H. is a H. I. Romnes Faculty  
507 Fellow, supported by the Office of the Vice Chancellor for Research and Graduate  
508 Education with funding from Wisconsin Alumni Research Foundation. QMW was  
509 supported by the National Natural Science Foundation of China (NSFC) under Grant Nos.  
510 31770018 and 31961133020. CRL holds the Canada Research Chair in Cellular Systems  
511 and Synthetic Biology, and his research on wild yeast is supported by a NSERC Discovery  
512 Grant.

513

## 514 **Author contributions**

515 DP performed most analyses (phenotyping, computational analyses, and figure plots)  
516 and data management; DP, CG, and QMW provided *COX2* and *COX3* sequences by  
517 PCR and Sanger sequencing; DP and JK designed the alignment pipeline; JK uploaded  
518 genomes to the [gxseq.glbrc.org](http://gxseq.glbrc.org) genome browser server; EJU and RLW confirmed *GAL*

519 genes by PCR and Sanger sequencing; MCK performed growth rate correlation analyses  
520 and plots for different sugar concentrations; QKL, ABH, and DAO prepared paired-end  
521 Illumina libraries; DP, MA, and JAK prepared mate-pair Illumina libraries; DP and QKL  
522 designed the population genomic pipeline; QMW, FYB, JBL, CRL, JPS, PG, DL, DH, KH,  
523 and JCF contributed key strains to study design; DP and CTH conceived of and designed  
524 the study; DP and CTH wrote the manuscript with editorial input from JK, MCK, QKL,  
525 JCF, CRL, JBL, FYB, KH, PG, and JPS; and all co-authors approved the final version of  
526 the manuscript.

527

## 528 **Author information**

### 529 *Data deposition statement*

530 Code availability: <https://perisd.github.io/Sac2.0/> website provides access to custom  
531 scripts and information regarding raw data. Raw data is deposited in FigShare  
532 (<https://figshare.com/s/93614f0e128d86f2ed8e>).

533 Data availability: Strains physically used in this study (i.e. with codes FM[Number]  
534 (e.g. FM1198) or yHXX[Number] (e.g. yHAB33) are available from [cthittinger@wisc.edu](mailto:cthittinger@wisc.edu)  
535 and have been submitted to the Portuguese Yeast Culture Collection (PYCC) (**Table S1**).  
536 *COX2* and *COX3* sequences were deposited in GenBank under accession nos.  
537 MH813536-MH813939. *GAL* genes that were Sanger-sequenced were deposited in  
538 GenBank under accession nos. OL660614-OL660618. Illumina sequencing data have  
539 been deposited in NCBI's SRA database, Bioproject PRJNA475869. Genome assemblies  
540 and annotations are available at [gxseq.glbrc.org](http://gxseq.glbrc.org) and on European Nucleotide Archive  
541 (ENA) project accession number PRJEB48264.



542 *Competing interest declaration*

543 Commercial use of *Saccharomyces eubayanus* strains requires a license from WARF  
544 (conflict declared by DP, QKL, and CTH) or CONICET (conflict declared by DL). Strains  
545 are available for academic research under a material transfer agreement. The remaining  
546 authors declare that the research was conducted in the absence of any commercial or  
547 financial relationships that could be construed as a potential conflict of interest.

548 **Figure legends**

549

550 **Figure 1. Geographic distribution of *Saccharomyces* strains.**

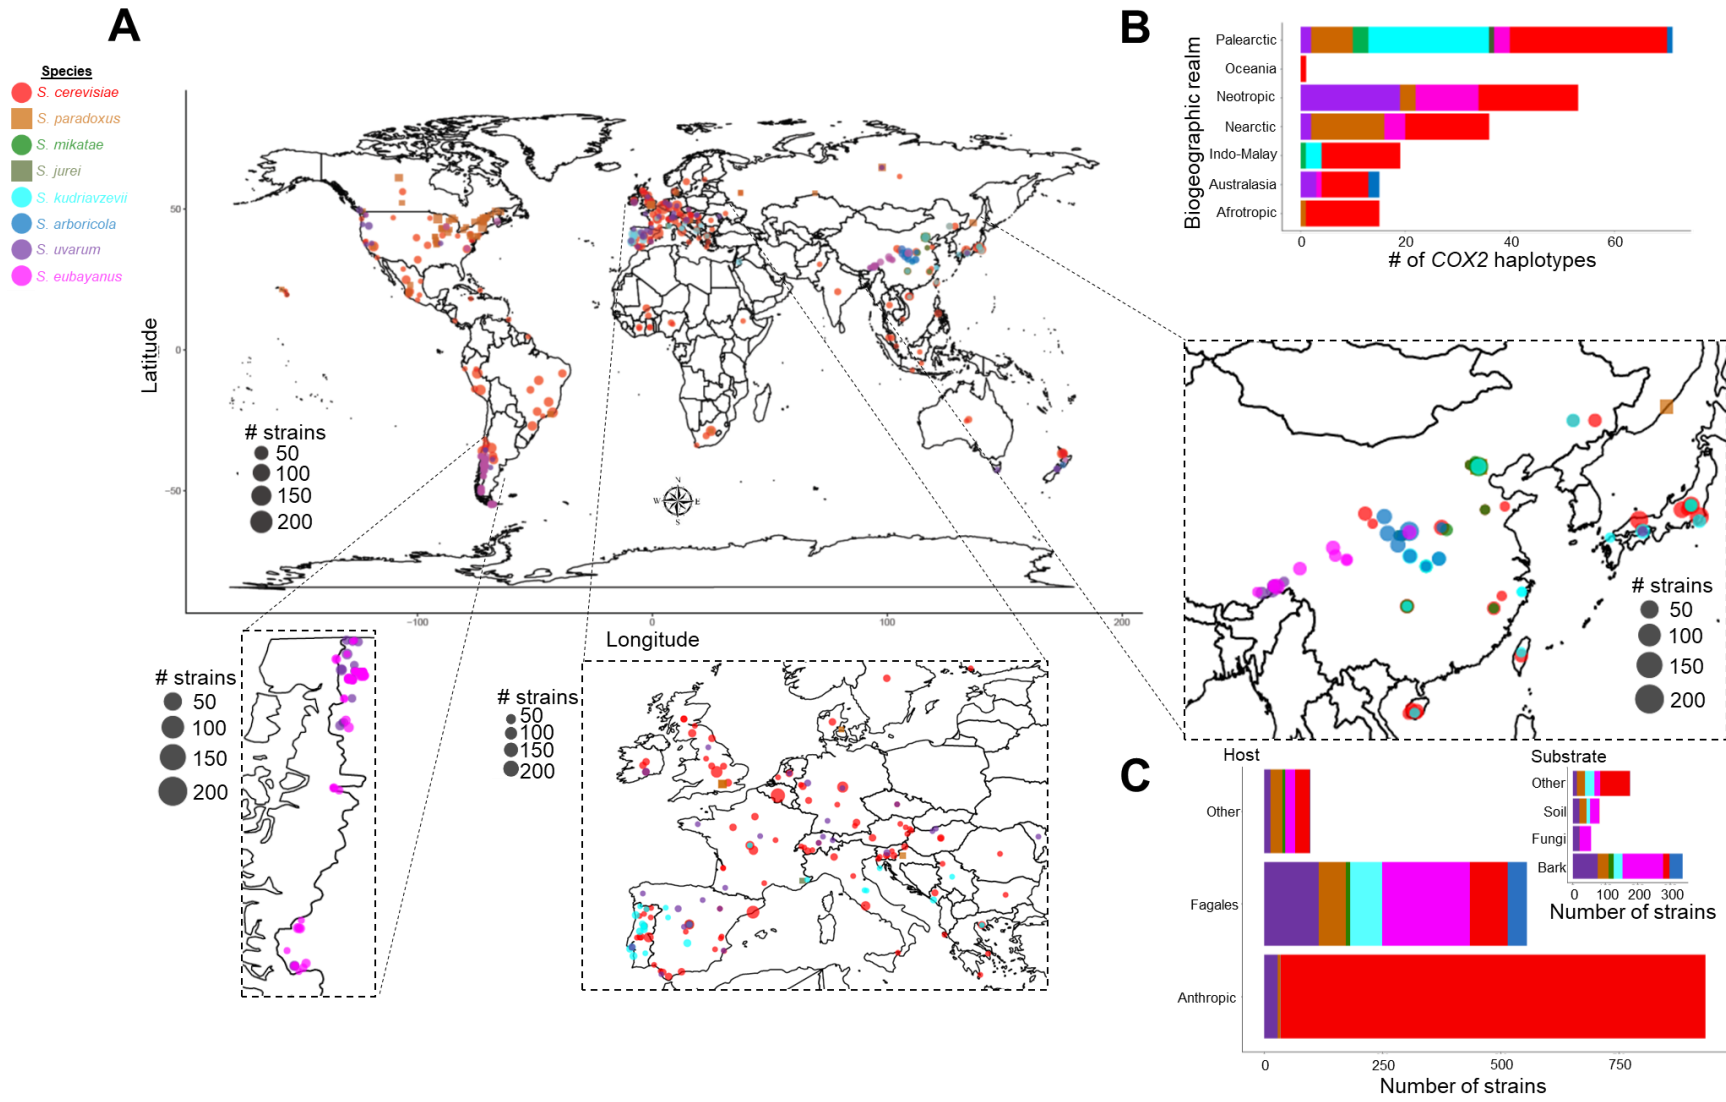

551

552 A) Map showing the locations where *Saccharomyces* strains have been isolated, scaled by size to the number of strains  
553 studied here. Symbols and colors designate the species. Ecological and geographic information about the strains can be  
554 found in [Table S1](#). B) Stacked bar plot showing the number of COX2 haplotypes isolated in each biogeographic realm  
555 ([Figure 2A](#)). The data shows many COX2 haplotypes from the Palearctic region, pointing to Asia as a hotspot of diversity.  
556 Bars are colored by species. The map was generated using the `map_data` function implemented in R package `ggplot2`  
557 <sup>99</sup>. C) Bar plots represent the total number of strains from each *Saccharomyces* species grouped by host (external plot) or  
558 substrates (inner plot) (full details in [Table S1 and Figure S2](#)). Human-related environments, such as vineyards, were  
559 grouped in the “Anthropic” hosts category and removed from the substrate plot. Bar plots are colored according to species.  
560  
561

562 **Figure 2. Extensive mitochondrial gene flow and introgression between *Saccharomyces***  
 563 **lineages.**

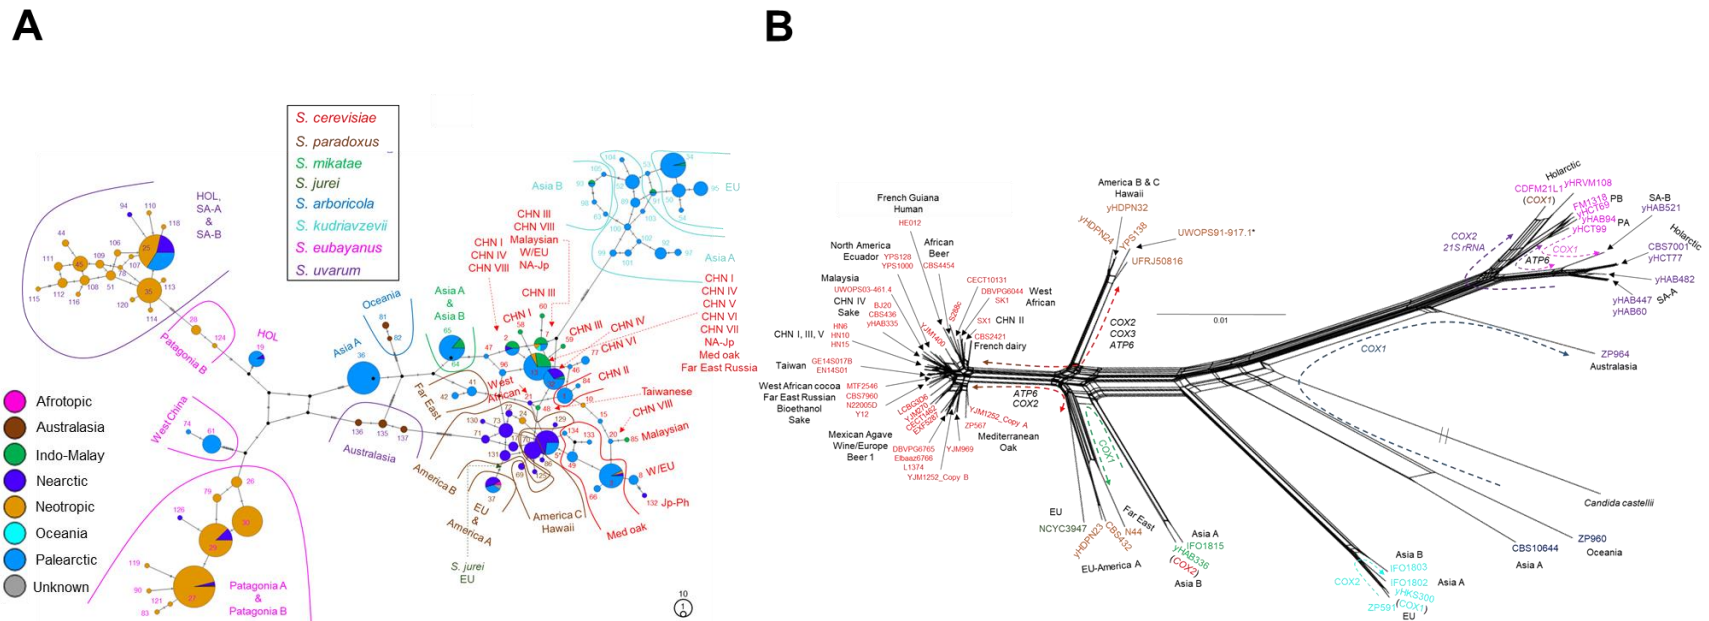

564  
 565 A) Templeton, Crandall, and Sing (TCS) phylogenetic network of 739 partial COX2 sequences from wild *Saccharomyces*  
 566 strains. COX2 haplotype classification, for the wild and anthropic *Saccharomyces* strains, is shown in Table S1. Haplotypes  
 567 are represented by circles. Circle size is scaled according to the haplotype frequency. Pie charts show the frequency of  
 568 haplotypes based on biogeographic realm. The number of mutations separating each haplotype are indicated by lines on  
 569 the edges connecting different haplotype circles. Haplotype numbers and populations are highlighted in the panel and

570 colored according to species designations. CHN: China; EU: Europe; HOL: Holarctic; Jp-Ph: Japan-Philippines (=Sake-  
571 Philippines); Med oak: Mediterranean oak; NA-Jp: North America-Japan (=North America); SA-A: South America A; SA-B:  
572 South America B; W/EU: Wine/European. B) Neighbor-Net phylogenetic network reconstructed using a concatenated  
573 alignment of the coding sequences of 10 mitochondrial genes (*ATP6*, *ATP8*, *ATP9*, *COB*, *COX1*, *COX2*, *COX3*, *VAR1*, and  
574 the genes encoding 15S rRNA and 21S rRNA) for 64 sequenced *Saccharomyces* strains representing all known  
575 *Saccharomyces* lineages that were available (Table S2). Strain names are colored according to species designations.  
576 Population names are highlighted in black. The scale is given in nucleotide substitution per site. Arrows highlight  
577 mitochondrial gene flow (intraspecies) and introgressions (interspecies) detected from individual gene trees (Figure S4);  
578 affected genes are shown close to the arrows with the color indicated by the species donor. Gene flow and introgressions  
579 unique to a *Saccharomyces* strain are indicated between parentheses. A similar phylogenetic network for the *COX3*  
580 mitochondrial gene is shown in Figure S3, which is more congruent with the concatenated data shown in panel B than the  
581 data for *COX2* shown in panel A. The asterisk indicates that UWOPS91-917.1 did not contain the introgression of *COX3*  
582 from *S. cerevisiae* found in other *Saccharomyces paradoxus* America B and C strains. Most of the *Saccharomyces jurei*  
583 (NCYC3947) protein-coding sequences were more closely related to the *S. paradoxus* Far East-EU clade, rather than to  
584 *Saccharomyces mikatae* (Figure S4).

585



590 to PCA and co-ancestry for better resolution (Figure S9A iv and v). B) Right: dot plot of mean amino acid identities (AAI)  
591 calculated from pairwise comparisons between populations and between species. Left: dot plot for comparisons of *Homo*  
592 *sapiens* with *Pan troglodytes*, *Macaca mulatta*, *Mus musculus*, and *Gallus gallus*. C) Global picture of the percentage of the  
593 Tamura-Nei-corrected pairwise genetic distance between populations and within *Saccharomyces* species. ????: values  
594 cannot be inferred because West China and Sichuan strains were unavailable for whole genome sequencing. N. A.: not  
595 applicable because only one strain was available from this population. Am: America; EU: European; FE: Far East; HOL:  
596 Holarctic; MD: Mediterranean Domesticated group; SA-A: South America A; SA-B: South America B; Sc: *S. cerevisiae*; Se:  
597 *S. eubayanus*; Sj: *S. jurei*; Sm: *S. mikatae*; Sp: *S. paradoxus*; WAfr: West African; IV: China IV.

598 **Figure 4.** Vertical inheritance and incomplete lineage sorting dominated in the nuclear genome,  
599 while introgression and gene flow were widespread among cytoplasmically inherited genetic  
600 elements.





602 A) Coalescent tree (species tree) for *Saccharomyces* lineages. Two values of concordance factors (CFs) are shown. Brown  
603 CFs were generated by IQTree using a collection of Maximum Likelihood phylogenetic trees (3850 genes) and the *ASTRAL*  
604 species tree. The normalized score was 0.97, which indicates that 97 % of input gene quartet trees are satisfied by the  
605 *ASTRAL* species tree. Purple CFs were generated by *BUCKY* using a collection of sample trees during Bayesian  
606 reconstruction in *MrBayes* and representative strains, mostly selected from Asia (asterisks). Other gene tree topologies are  
607 shown in [Figure S13](#). Chromosomal translocations ([Figure S5](#)) and mitochondrial rearrangements ([Figure S7,S8](#)) are  
608 reported by red and blue bars on branches, respectively. The insertion of a 2- $\mu$ m plasmid gene into the nuclear genome  
609 ([Table S4](#)) is represented by green bars on branches. The scale is coalescent units. B) Maximum-likelihood phylogenetic  
610 tree of all studied *Saccharomyces* strains reconstructed using the common *BUSCO* genes and collapsed to the species level  
611 (full tree in [Figure 5B](#)). Scale bars show the number of substitutions per site. Population names are only shown for those  
612 involved in gene flow or introgression based on the genome-wide analysis. B i) Summary of detected nuclear gene flow  
613 (between populations) and introgression (between species). The quantified percent of genome contribution by the donor is  
614 indicated near to the dashed arrow. *Saccharomyces cerevisiae* introgressions were congruent with previous reports <sup>13,19,64</sup>.  
615 B ii) summary of detected gene flow and introgression for the mitochondrial genome (squared symbol) and 2- $\mu$ m plasmid  
616 (triangle symbol). The direction of the arrow indicates the donor lineage. Unknown donor lineages are colored in black.  
617 Strain names, branches, and arrows are colored according to the species designations or their donors. C) Geographic  
618 locations of the different *Saccharomyces* populations. We omitted the global distribution of Wine/European *S. cerevisiae*

619 population for clarity. The location of populations, for which strains were not studied here, are indicated with an asterisk  
620 symbol. Species-specific populations are colored according to the left legend.

621 **Figure 5.** The genus *Saccharomyces* is phenotypically diverse.

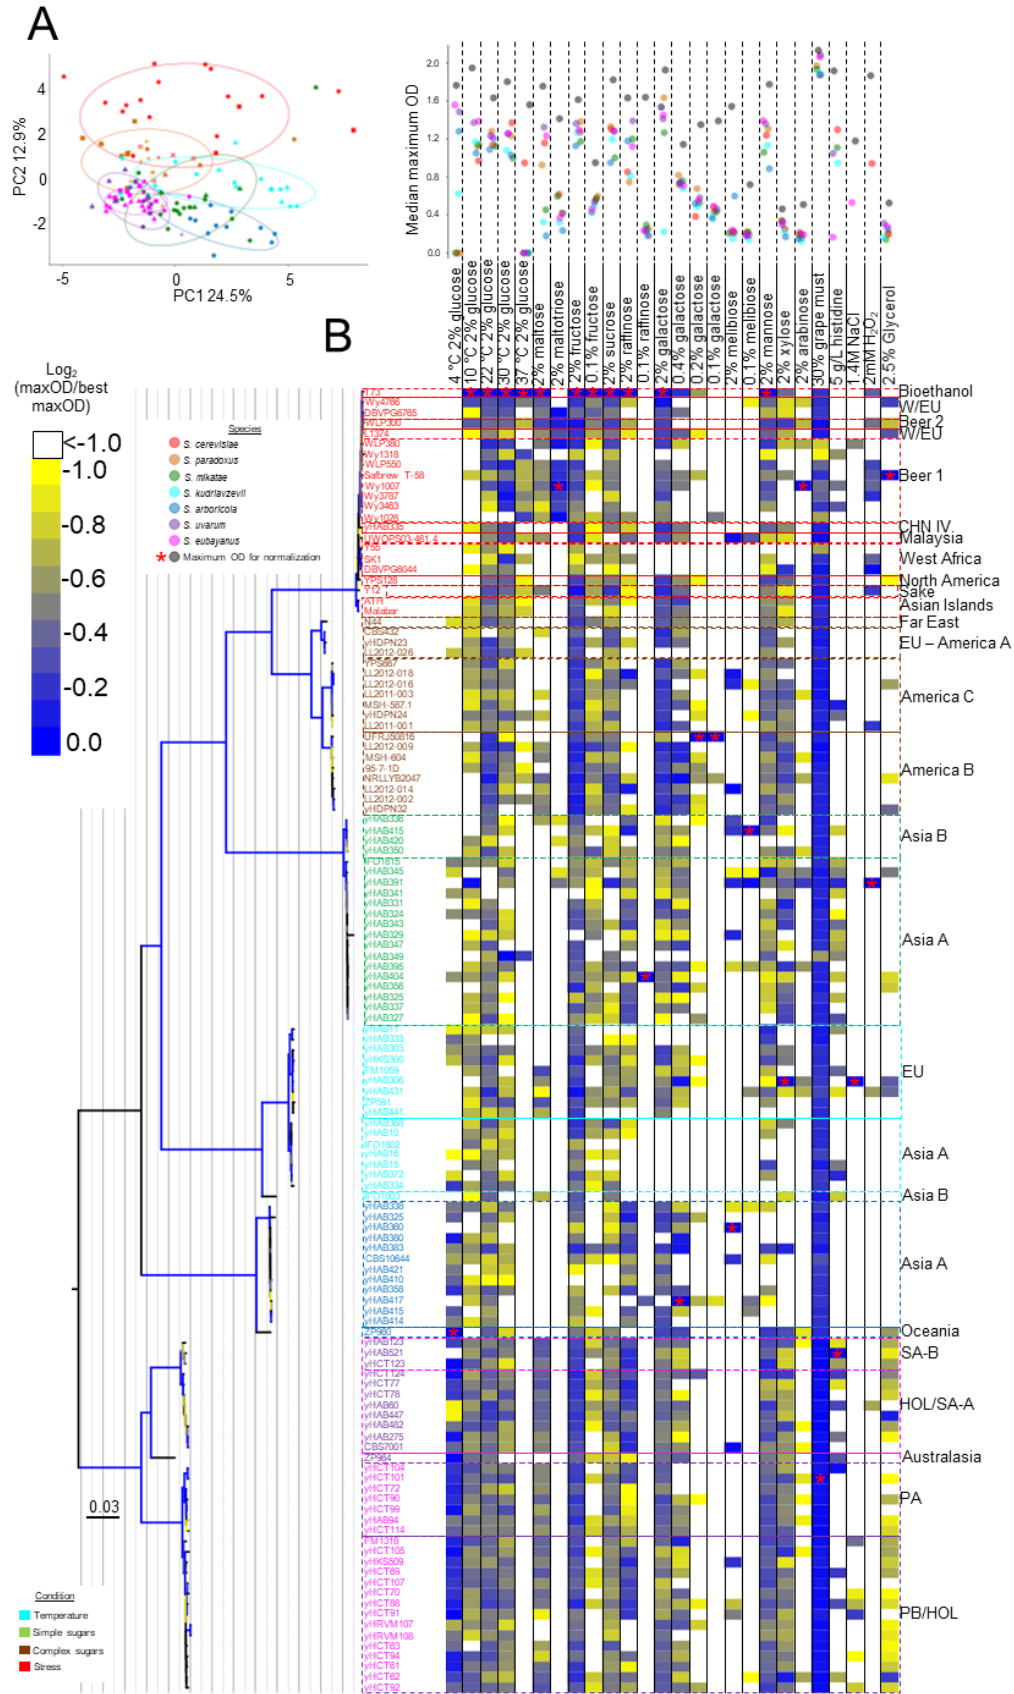

623 A) Principal component analysis (PCA) of PC1 and PC2 of the maximum OD<sub>600</sub> calculated  
624 from growth curves (n = 3) calculated from an array of twenty-six media conditions (Table  
625 S6). PC1 and PC2 accounted for 37.4 % of the total variation. A higher image resolution  
626 PCA with growth condition weights can be found in Figure S24A. The variation explained  
627 by each component is shown in Figure S24B, and a plot of PC1 and PC3 is shown in  
628 Figure S24C. Strains are colored according to their species designations, and different  
629 shapes represent their population or lineage designation (see below). B) Heatmap  
630 showing the maximum OD<sub>600</sub>, normalized by the highest value for each growth condition  
631 as indicated by a red asterisk. Heat colors from yellow (low growth) to blue (high growth)  
632 are scaled according to the bar in the left. White colors indicate log<sub>2</sub> values lower than -1  
633 or no detected growth. Growth conditions are columns, and strains are rows. The dot plot  
634 above the growth conditions shows the maximum OD<sub>600</sub> value used for normalizing the  
635 data for each growth condition (grey dot), and the colored dots are median maximum  
636 OD<sub>600</sub> value for each *Saccharomyces* species. A maximum-likelihood (ML) phylogenetic  
637 tree of 14 orthologs (~8.7 Kbp) for the phenotyped strains is shown to the left of the  
638 heatmap. Branches are colored according to their bootstrap support (minimum, yellow –  
639 maximum, dark blue). Strain names are colored according to species designations.  
640 Population designations are written to the right of the heatmap. The bottom colored bars  
641 highlight the conditions tested: temperature, simple or complex sugars, and stress. CHN:  
642 China; EU: Europe; HOL/SA-A: Holarctic/South America A; PA: Patagonia A; PB/HOL:  
643 Patagonia B/Holarctic; SA-B: South America B. iTOL tree at <http://bit.ly/2VthpGT>.

644 **Figure 6. Phenotypic diversity and complex ancestries.**

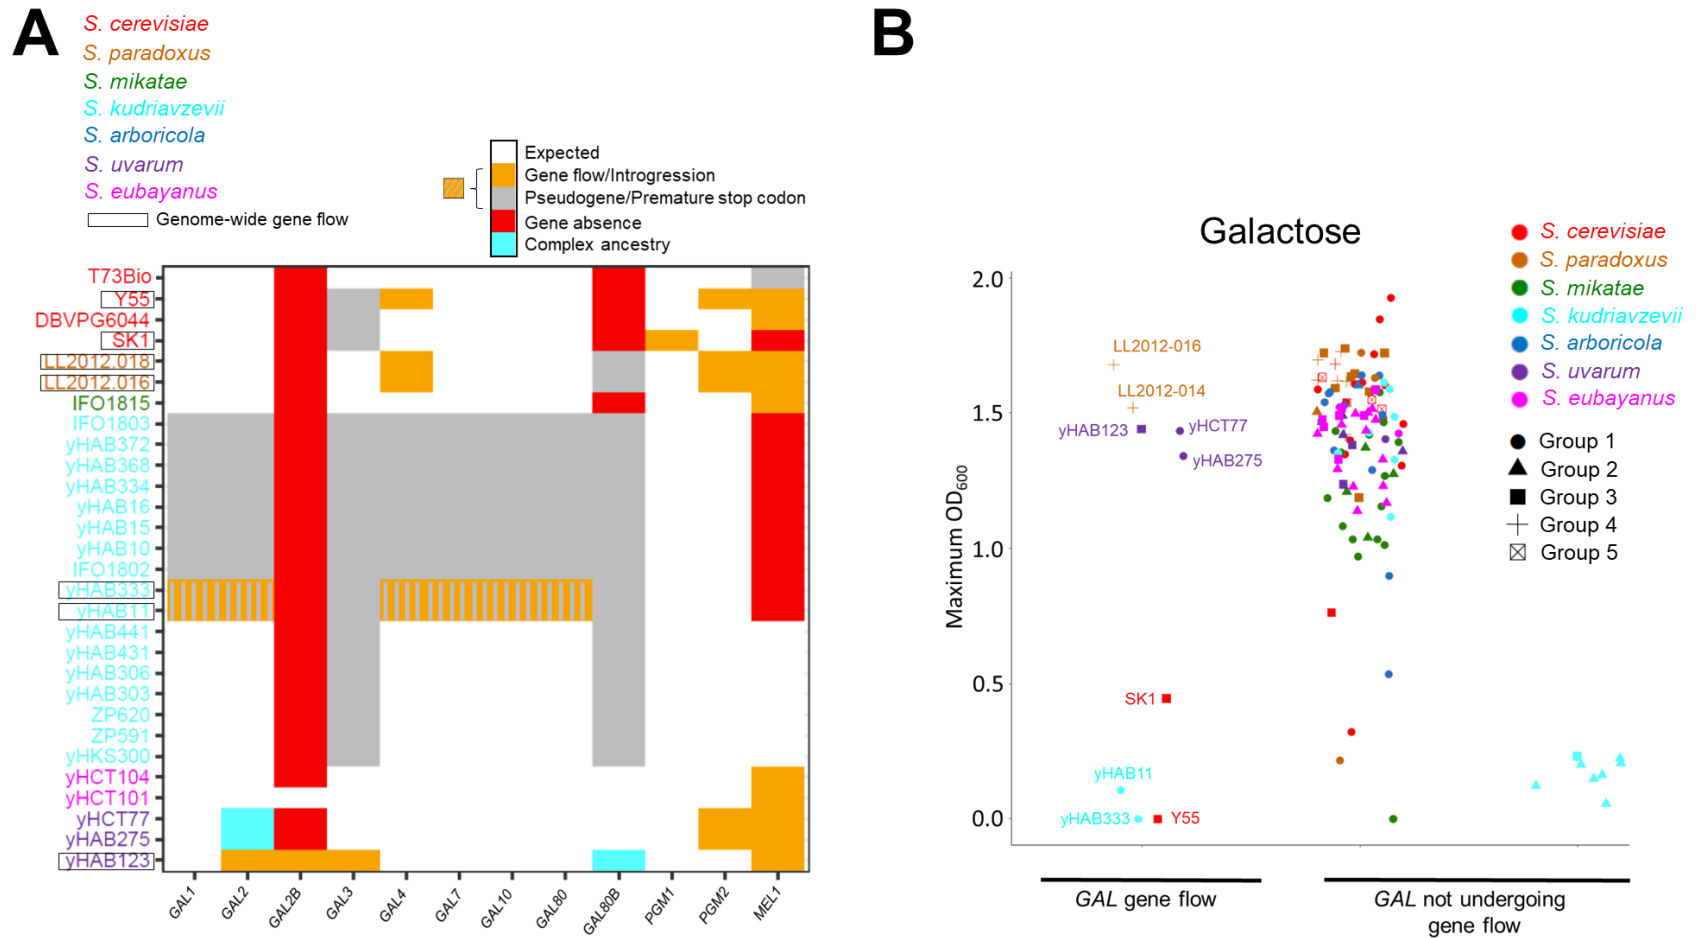

645

646 A) *Saccharomyces* strains affected by gene-flow for the *GAL* regulon genes. Names of strains with genome-wide admixture

647 (Table S3) are boxed. Strain names are colored according to species designations. Complete genes with a phylogenetic

648 position (Figure S28) as expected based on population genomic analysis (Figure S9) are labeled as white. Genes acquired  
649 from another lineage by gene flow are labelled orange. Genes with premature stop codons or in a more advanced state of  
650 pseudogenization are labelled gray. Genes with a complex ancestry, such as unexpectedly ancient alleles, are labelled  
651 cyan. Genes not detected by any of the methods employed in this study (see Online Material and Methods) were considered  
652 absent and are labelled red. B) Maximum biomass production (OD<sub>600</sub>) on 2 % galactose. Each point is a strain colored by  
653 species designation. Data was split based on whether (left) or not (right) gene flow had occurred. Asia A and B  
654 *S. kudriavzevii* (on the right) were separated from the rest of *Saccharomyces* data points for clarity. The groups are defined  
655 as follows:

- 656 i) *S. cerevisiae*: Group 1 (Domesticated strains: Bioethanol, Beer 1 & 2, Wine/European, Sake), Group 3 (West African),  
657 Group 4 (CHN IV), Group 5 (Asian Islands, Malaysian, North American).
- 658 ii) *S. paradoxus*: Group 1 (European), Group 2 (Far East), Group 3 (America B), Group 4 (America C).
- 659 iii) *S. mikatae*: Group 1 (Asia A), Group 2 (Asia B).
- 660 iv) *S. kudriavzevii*: Group 1 (EU), Group 2 (Asia A), Group 3 (Asia B).
- 661 v) *S. arboricola*: Group 1 (Asia A), Group 2 (Oceania).
- 662 vi) *S. uvarum*: Group 1 (Holarctic), Group 2 (South America A), Group 3 (South America B), Group 4 (Australasia).
- 663 vii) *S. eubayanus*: Group 1 (Holarctic), Group 2 (Patagonia B), Group 3 (Patagonia A).

664



## 665 **Online Material & Methods**

### 666 **Extended tables**

667 **Table S1.** List of strains used in this study.

668 **Table S2.** Sequencing and genome assembly statistics.

669 **Table S3.** Genome contributions in admixed and introgressed strains.

670 **Table S4.** *Saccharomyces* 2- $\mu$ m plasmid information.

671 **Table S5.** Reciprocal monophyly tests.

672 **Table S6.** Kinetic growth parameter information for *Saccharomyces* strains.

673 **Table S7.** PCR primers and conditions.

### 674 **Supplementary Notes & Figures**

675 **Supplementary Note 1** – Nuclear and mitochondrial genome diversity.

676 **Supplementary Note 2** – *Saccharomyces* phenotypic diversity.

677 **Figure S1.** Geographic locations of *Saccharomyces* populations.

678 **Figure S2.** Association biases for hosts and substrates of *Saccharomyces* strains.

679 **Figure S3.** COX3 phylogenetic network of *Saccharomyces* strains.

680 **Figure S4.** Phylogenetic networks of mitochondrial genes.

681 **Figure S5.** Genome dot plots of *Saccharomyces* strains compared to the *S. cerevisiae*  
682 S288C laboratory strain.

683 **Figure S6.** Highly diverse genomic architectures among *Saccharomyces* species.

684 **Figure S7.** Mitochondrial genome dot plots of *Saccharomyces* strains compared to the  
685 *S. cerevisiae* S288C laboratory strain.

- 686 **Figure S8.** Mitochondrial genome dot plots of *Saccharomyces* populations compared to  
687 other populations.
- 688 **Figure S9.** Population genomics of seven *Saccharomyces* species.
- 689 **Figure S10.** Genome-wide pairwise nucleotide sequence divergence plots for admixture  
690 *Saccharomyces* strains.
- 691 **Figure S11.** Genetic distance distributions.
- 692 **Figure S12.** Fst distributions.
- 693 **Figure S13.** BUCKy concordance primary tree and alternative topologies.
- 694 **Figure S14.** Phylogenomic network of *Saccharomyces* single-copy orthologous genes.
- 695 **Figure S15.** Levels of heterozygosity among *Saccharomyces* strains.
- 696 **Figure S16.** Introgressions between *S. cerevisiae* and *S. paradoxus*.
- 697 **Figure S17.** *Saccharomyces* 2  $\mu$ m plasmid inheritance.
- 698 **Figure S18.** Percentage of *Saccharomyces* that grew above OD<sub>600</sub>=0.5 in various growth  
699 conditions.
- 700 **Figure S19.** Growth conditions promoting flocculation among *Saccharomyces* strains.
- 701 **Figure S20.** Growth variation in simple sugars across concentrations and the impact of  
702 Gal4-binding sites.
- 703 **Figure S21.** Lag time and maximum growth rate correlations between low and high sugar  
704 concentrations.
- 705 **Figure S22.** Lag time correlations between monosaccharides and their disaccharides or  
706 trisaccharides.
- 707 **Figure S23.** Phenotypic variance across *Saccharomyces* species.
- 708 **Figure S24.** Principal component analysis of maximum OD<sub>600</sub>.

- 709 **Figure S25.** Variance contributed to each component by growth condition.
- 710 **Figure S26.** Kinetic parameters of *Saccharomyces* strains in different growth conditions.
- 711 **Figure S27.** Melibiose phenotypic diversity generated through complex genomic  
712 ancestries.
- 713 **Figure S28.** Individual phylogenetics trees of the *GAL/MEL* pathway.
- 714 **Figure S29.** Maximum OD600 violin boxplots of *Saccharomyces* populations/groups.
- 715 **Figure S30.** Summary statistics of *Saccharomyces* genome assemblies.

## 716 **References**

- 717
- 718 1 World Health Organization, 2015.
- 719 2 National Research Council: Board on Biology: Commission on Life Sciences:  
720 Committee on Noneconomic and Economic Value of Biodiversity, *perspectives on*  
721 *biodiversity: valuing its role in an everchanging world* (National Academy Press,  
722 Washington, DC, 1999).
- 723 3 Gasch, A. P., Payseur, B. A., and Pool, J. E., "The power of natural variation for model  
724 organism biology," *Trends Genet* **32**, 147-154 (2016).
- 725 4 Boekhout, T., *et al.*, "The evolving species concepts used for yeasts: from phenotypes  
726 and genomes to speciation networks," *Fungal Diversity* (2021).
- 727 5 Ernst Mayr and William B Provine, *the evolutionary synthesis: perspectives on the*  
728 *unification of biology* (Harvard University Press, 1998).
- 729 6 Lewin, H. A., *et al.*, "Earth BioGenome Project: Sequencing life for the future of life,"  
730 *Proc. Natl. Acad. Sci. U. S. A.* **115**, 4325 (2018).
- 731 7 Formenti, G., *et al.*, "The era of reference genomes in conservation genomics," *Trends*  
732 *in Ecology & Evolution* **37**, 197-202 (2022).
- 733 8 Botstein, D., Chervitz, S. A., and Cherry, M., "Yeast as a model organism," *Science*  
734 **277**, 1259 (1997).
- 735 9 O'Malley, M. A., "'Everything is everywhere: but the environment selects': ubiquitous  
736 distribution and ecological determinism in microbial biogeography," *Studies in History*  
737 *and Philosophy of Science Part C: Studies in History and Philosophy of Biological and*  
738 *Biomedical Sciences* **39**, 314-325 (2008).

- 739 10 Jeffares, D. C., *et al.*, "The genomic and phenotypic diversity of *Schizosaccharomyces*  
740 *pombe*," *Nat Genet* **47**, 235-241 (2015).
- 741 11 Ellison, C. E., *et al.*, "Population genomics and local adaptation in wild isolates of a  
742 model microbial eukaryote," *Proc. Natl. Acad. Sci. U. S. A.* **108**, 2831-2836 (2011).
- 743 12 Yue, J. X., *et al.*, "Contrasting evolutionary genome dynamics between domesticated  
744 and wild yeasts," *Nat Genet* **49**, 913-924 (2017).
- 745 13 Peter, J., *et al.*, "Genome evolution across 1,011 *Saccharomyces cerevisiae* isolates,"  
746 *Nature* **556**, 339-344 (2018).
- 747 14 Leducq, J. B., *et al.*, "Speciation driven by hybridization and chromosomal plasticity in  
748 a wild yeast," **1**, 15003 (2016).
- 749 15 Scannell, D. R., *et al.*, "The awesome power of yeast evolutionary genetics: new  
750 genome sequences and strain resources for the *Saccharomyces sensu stricto* genus,"  
751 *G3* **1**, 11-25 (2011).
- 752 16 Liti, G., *et al.*, "High quality *de novo* sequencing and assembly of the *Saccharomyces*  
753 *arboricolus* genome," *BMC Genomics* **14**, 69 (2013).
- 754 17 Baker, E., *et al.*, "The genome sequence of *Saccharomyces eubayanus* and the  
755 domestication of lager-brewing yeasts," *Mol. Biol. Evol.* **32**, 2818-2831 (2015).
- 756 18 Naseeb, S., *et al.*, "Whole genome sequencing, *de novo* assembly and phenotypic  
757 profiling for the new budding yeast species *Saccharomyces jurei*," *G3* **8**, 2967-2977  
758 (2018).
- 759 19 Liti, G., *et al.*, "Population genomics of domestic and wild yeasts," *Nature* **458**, 337-  
760 341 (2009).
- 761 20 Almeida, P., *et al.*, "A population genomics insight into the Mediterranean origins of  
762 wine yeast domestication," *Mol Ecol* **24**, 5412-5427 (2015).
- 763 21 Gayevskiy, V. and Goddard, M. R., "*Saccharomyces eubayanus* and *Saccharomyces*  
764 *arboricola* reside in North Island native New Zealand forests," *Environ Microbiol* **18**,  
765 1137-1147 (2015).
- 766 22 Bing, J., *et al.*, "Evidence for a Far East Asian origin of lager beer yeast," *Curr Biol* **24**,  
767 R380-R381 (2014).
- 768 23 Gallone, B., *et al.*, "Domestication and divergence of *Saccharomyces cerevisiae* beer  
769 yeasts," *Cell* **166**, 1397-1410 (2016).
- 770 24 Peris, D., *et al.*, "Complex ancestries of lager-brewing hybrids were shaped by  
771 standing variation in wild yeast *Saccharomyces eubayanus*," **12**, e1006155 (2016).

- 772 25 Duan, S. F., *et al.*, "The origin and adaptive evolution of domesticated populations of  
773 yeast from Far East Asia," *Nature Communications* **9**, 2690 (2018).
- 774 26 Langdon, Q. K., *et al.*, "Postglacial migration shaped the genomic diversity and global  
775 distribution of the wild ancestor of lager-brewing hybrids," **16**, e1008680 (2020).
- 776 27 Nespolo, R. F., *et al.*, "An Out-of-Patagonia migration explains the worldwide diversity  
777 and distribution of *Saccharomyces eubayanus* lineages," **16**, e1008777 (2020).
- 778 28 Bendixsen, D. P., *et al.*, "Genomic evidence of an ancient East Asian divergence event  
779 in wild *Saccharomyces cerevisiae*," *Genome Biol Evol* **13** (2021).
- 780 29 Borneman, A. R. and Pretorius, I. S., "Genomic insights into the *Saccharomyces*  
781 *sensu stricto* complex," *Genetics* **199**, 281-291 (2015).
- 782 30 Shen, X. X., *et al.*, "Tempo and mode of genome evolution in the budding yeast  
783 subphylum," *Cell* **175**, 1533-1545 (2018).
- 784 31 Almeida, P., *et al.*, "A Gondwanan imprint on global diversity and domestication of  
785 wine and cider yeast *Saccharomyces uvarum*," *Nat Commun* **5**, 4044 (2014).
- 786 32 Peris, D., *et al.*, "Hybridization and adaptive evolution of diverse *Saccharomyces*  
787 species for cellulosic biofuel production," *Biotechnol Biofuels* **10**, 78 (2017).
- 788 33 Eizaguirre, J. I., *et al.*, "Phylogeography of the wild Lager-brewing ancestor  
789 (*Saccharomyces eubayanus*) in Patagonia," *Environ Microbiol* **20**, 3732-3743 (2018).
- 790 34 Boynton, P. J. and Greig, D., "The ecology and evolution of non-domesticated  
791 *Saccharomyces* species," *Yeast* **31**, 449-462 (2014).
- 792 35 Wang, Q. M., *et al.*, "Surprisingly diverged populations of *Saccharomyces cerevisiae*  
793 in natural environments remote from human activity," *Mol Ecol* **21**, 5404-5417 (2012).
- 794 36 Fay, J., *et al.*, "A polyploid admixed origin of beer yeasts derived from European and  
795 Asian wine populations," **17**, e3000147 (2019).
- 796 37 Han, D. Y., *et al.*, "Adaptive gene content and allele distribution variations in the wild  
797 and domesticated populations of *Saccharomyces cerevisiae*," **12**, 247 (2021).
- 798 38 Kuehne, H. A., *et al.*, "Allopatric divergence, secondary contact, and genetic isolation  
799 in wild yeast populations," *Curr Biol* **17**, 407-411 (2007).
- 800 39 Shen, X. X., *et al.*, "Reconstructing the backbone of the Saccharomycotina yeast  
801 phylogeny using genome-scale data," *G3* (2016).
- 802 40 Rokas, A., *et al.*, "Genome-scale approaches to resolving incongruence in molecular  
803 phylogenies," *Nature* **425**, 798-804 (2003).

- 804 41 Yu, Y., Degnan, J. H., and Nakhleh, L., "The probability of a gene tree topology within  
805 a phylogenetic network with applications to hybridization detection," **8**, e1002660  
806 (2012).
- 807 42 Rokas, A. and Carroll, S. B., "Bushes in the Tree of Life," **4**, e352 (2006).
- 808 43 Liti, G., Barton, D. B., and Louis, E. J., "Sequence diversity, reproductive isolation and  
809 species concepts in *Saccharomyces*," *Genetics* **174**, 839-850 (2006).
- 810 44 Leducq, J.-B., *et al.*, "Mitochondrial recombination and introgression during speciation  
811 by hybridization," *Mol. Biol. Evol.* **34**, 1947-1959 (2017).
- 812 45 Wu, B., Buljic, A., and Hao, W., "Extensive horizontal transfer and homologous  
813 recombination generate highly chimeric mitochondrial genomes in yeast," *Mol. Biol.*  
814 *Evol.* **32**, 2559-2570 (2015).
- 815 46 Wu, B. and Hao, W., "A dynamic mobile DNA family in the yeast mitochondrial  
816 genome," *G3* **5**, 1273-1282 (2015).
- 817 47 Peris, D., *et al.*, "Mitochondrial introgression suggests extensive ancestral  
818 hybridization events among *Saccharomyces* species," *Mol Phylogenet Evol* **108**, 49-  
819 60 (2017).
- 820 48 Strope, P. K., *et al.*, "2 $\mu$  plasmid in *Saccharomyces* species and in *Saccharomyces*  
821 *cerevisiae*," *FEMS Yeast Res.* **15**, fov090 (2015).
- 822 49 Conde, J. and Fink, G. R., "A mutant of *Saccharomyces cerevisiae* defective for  
823 nuclear fusion," **73**, 3651-3655 (1976).
- 824 50 Li, X. C., *et al.*, "Mitochondria-encoded genes contribute to the evolution of heat and  
825 cold tolerance among *Saccharomyces* species," *Sci Adv* **5**, eaav1848 (2019).
- 826 51 Gonçalves, P., *et al.*, "Evidence for divergent evolution of growth temperature  
827 preference in sympatric *Saccharomyces* species," *PLoS ONE* **6**, e20739 (2011).
- 828 52 Salvadó, Z., *et al.*, "Temperature adaptation markedly determines evolution within the  
829 genus *Saccharomyces*," *Appl Environ Microbiol* **77**, 2292-2302 (2011).
- 830 53 Kuang, M. C., *et al.*, "Ongoing resolution of duplicate gene functions shapes the  
831 diversification of a metabolic network," *ELife Sciences* **5**, e19027 (2016).
- 832 54 Kuang, M. C., *et al.*, "Repeated cis-regulatory tuning of a metabolic bottleneck gene  
833 during evolution," *Mol. Biol. Evol.* **35**, 1968-1981 (2018).
- 834 55 Pontes, A., *et al.*, "Revisiting the taxonomic synonyms and populations of  
835 *Saccharomyces cerevisiae* - phylogeny, phenotypes, ecology and domestication," **8**  
836 (2020).

- 837 56 Dulermo, R., *et al.*, "Truncation of Gal4p explains the inactivation of the *GAL/MEL*  
838 regulon in both *Saccharomyces bayanus* and some *S. cerevisiae* wine strains," *FEMS*  
839 *Yeast Res.* **16** (2016).
- 840 57 Warringer, J., *et al.*, "Trait variation in yeast is defined by population history," **7**,  
841 e1002111 (2011).
- 842 58 Hittinger, C. T., *et al.*, "Remarkably ancient balanced polymorphisms in a multi-locus  
843 gene network," *Nature* **464**, 54-58 (2010).
- 844 59 Hittinger, C. T., Rokas, A., and Carroll, S. B., "Parallel inactivation of multiple GAL  
845 pathway genes and ecological diversification in yeasts," *Proc. Natl. Acad. Sci. U. S.*  
846 *A.* **101**, 14144-14149 (2004).
- 847 60 Boocock, J., *et al.*, "Ancient balancing selection maintains incompatible versions of  
848 the galactose pathway in yeast," *Science* **371**, 415-419 (2021).
- 849 61 Harrison, M. C., *et al.*, "The evolution of the GALactose utilization pathway in budding  
850 yeasts," *Trends Genet* **38**, 97-109 (2022).
- 851 62 Legras, J. L., *et al.*, "Adaptation of *S. cerevisiae* to fermented food environments  
852 reveals remarkable genome plasticity and the footprints of domestication," *Mol. Biol.*  
853 *Evol.* **35**, 1712-1727 (2018).
- 854 63 Duan, S. F., *et al.*, "Reverse evolution of a classic gene network in yeast offers a  
855 competitive advantage," *Curr Biol* **29**, 1126-1136 (2019).
- 856 64 Liti, G., "The fascinating and secret wild life of the budding yeast *S. cerevisiae*," *ELife*  
857 *Sciences* **4**, e05835 (2015).
- 858 65 He, P. Y., *et al.*, "Highly diverged lineages of *Saccharomyces paradoxus* in temperate  
859 to subtropical climate zones in China," *Yeast* **39**, 69-82 (2021).
- 860 66 Suh, A., Smeds, L., and Ellegren, H., "The dynamics of Incomplete Lineage Sorting  
861 across the ancient adaptive radiation of Neoavian birds," **13**, e1002224 (2015).
- 862 67 Chou, J. Y., *et al.*, "Multiple molecular mechanisms cause reproductive isolation  
863 between three yeast species," **8**, e1000432 (2010).
- 864 68 Hou, J., *et al.*, "Comprehensive survey of condition-specific reproductive isolation  
865 reveals genetic incompatibility in yeast," *Nat Commun* **6** (2015).
- 866 69 Delneri, D., *et al.*, "Engineering evolution to study speciation in yeasts," *Nature* **422**,  
867 68-72 (2003).
- 868 70 Fischer, G., *et al.*, "Chromosomal evolution in *Saccharomyces*," *Nature* **405**, 451-454  
869 (2000).

- 870 71 Sulo, P., *et al.*, "The evolutionary history of *Saccharomyces* species inferred from  
871 completed mitochondrial genomes and revision in the 'yeast mitochondrial genetic  
872 code'," *DNA Res* **24**, 571-583 (2017).
- 873 72 Mozzachiodi, S., *et al.*, "Yeasts from temperate forests," *Yeast* **39**, 4-24 (2022).
- 874 73 Mathieu Hénault, *et al.*, "Yeast Population Genomics Goes Wild: the Case of  
875 *Saccharomyces Paradoxus*," in *Population Genomics: Microorganisms*, edited by  
876 Martin F. Polz and Om P. Rajora (Springer International Publishing, Cham, 2019),  
877 pp.207-230.
- 878 74 Gonzalez Flores, M., *et al.*, "Human-associated migration of Holarctic-*Saccharomyces*  
879 *uvarum*-strains to Patagonia," *Fungal Ecology* **48**, 100990 (2020).
- 880 75 Naseeb, S., *et al.*, "*Saccharomyces jurei* sp. nov., isolation and genetic identification  
881 of a novel yeast species from *Quercus robur*," *Int J Syst Evol Microbiol* **67**, 2046-2052  
882 (2017).
- 883 76 Kong, H., *et al.*, "Both temperature fluctuations and East Asian monsoons have driven  
884 plant diversification in the karst ecosystems from southern China," *Mol Ecol* **26**, 6414-  
885 6429 (2017).
- 886 77 Peters, M. K., *et al.*, "Predictors of elevational biodiversity gradients change from  
887 single taxa to the multi-taxa community level," *Nature Communications* **7**, 13736  
888 (2016).
- 889 78 Weiss, C. V., *et al.*, "Genetic dissection of interspecific differences in yeast  
890 thermotolerance," *Nature Genetics* **50**, 1501-1504 (2018).
- 891 79 Baker, E. P., *et al.*, "Mitochondrial DNA and temperature tolerance in lager yeasts,"  
892 *Sci Adv* **5**, eaav1869 (2019).
- 893 80 Charron, G., Leducq, J. B., and Landry, C. R., "Chromosomal variation segregates  
894 within incipient species and correlates with reproductive isolation," *Mol Ecol* **23**, 4362-  
895 4372 (2014).
- 896 81 Robinson, H. A., Pinharanda, A., and Bensasson, D., "Summer temperature can  
897 predict the distribution of wild yeast populations," *Ecol Evol* **6**, 1236-1250 (2016).
- 898 82 Fitzpatrick, D. A., "Horizontal gene transfer in fungi," *FEMS Microbiol Lett* **329**, 1-8  
899 (2011).
- 900 83 Novo, M., *et al.*, "Eukaryote-to-eukaryote gene transfer events revealed by the  
901 genome sequence of the wine yeast *Saccharomyces cerevisiae* EC1118," *Proc. Natl.*  
902 *Acad. Sci. U. S. A.* **106**, 16333-16338 (2009).
- 903 84 Marsit, S., *et al.*, "Evolutionary advantage conferred by an eukaryote-to-eukaryote  
904 gene transfer event in wine yeasts," *Mol. Biol. Evol.* **32**, 1695-1707 (2015).



- 905 85 Langdon, Q. K., *et al.*, "Fermentation innovation through complex hybridization of wild  
906 and domesticated yeasts," *Nature Ecology & Evolution* **3**, 1576-1586 (2019).
- 907 86 Gallone, B., *et al.*, "Interspecific hybridization facilitates niche adaptation in beer  
908 yeast," *Nature Ecology & Evolution* **3**, 1562-1575 (2019).
- 909 87 Bendixsen, D. P., Peris, D., and Stelkens, R., "Patterns of genomic instability in  
910 interspecific yeast hybrids with diverse ancestries," *Frontiers in Fungal Biology* **2**, 52  
911 (2021).
- 912 88 Nagata, N., *et al.*, "Mechanical barriers to introgressive hybridization revealed by  
913 mitochondrial introgression patterns in *Ohomopterus* ground beetle assemblages,"  
914 *Mol Ecol* **16**, 4822-4836 (2007).
- 915 89 Bryson, R. W., *et al.*, "The role of mitochondrial introgression in illuminating the  
916 evolutionary history of Nearctic treefrogs," *Zool J Linn Soc* **172**, 103-116 (2014).
- 917 90 Mastrantonio, V., *et al.*, "Dynamics of mtDNA introgression during species range  
918 expansion: insights from an experimental longitudinal study," *Scientific Reports* **6**,  
919 30355 (2016).
- 920 91 Payseur, B. A. and Rieseberg, L. H., "A genomic perspective on hybridization and  
921 speciation," *Mol Ecol* **25**, 2337-2360 (2016).
- 922 92 L. H. Rieseberg and M. E. Welch, "Gene Transfer Through Introgressive Hybridisation:  
923 History, Evolutionary Significance and Phylogenetic Consequences," in *Horizontal*  
924 *gene transfer*, edited by M Syvanen and CI Kado (Academic Press, 2002), pp.199-  
925 216.
- 926 93 Naumov, G. I., *et al.*, "Three new species in the *Saccharomyces sensu stricto*  
927 complex: *Saccharomyces cariocanus*, *Saccharomyces kudriavzevii* and  
928 *Saccharomyces mikatae*," *Int J Syst Evol Microbiol* **50**, 1931-1942 (2000).
- 929 94 Libkind, D., *et al.*, "Microbe domestication and the identification of the wild genetic  
930 stock of lager-brewing yeast," *Proc. Natl. Acad. Sci. U. S. A.* **108**, 14539-14544 (2011).
- 931 95 Bendixsen, D. P., Frazão, J. G., and Stelkens, R., "*Saccharomyces* yeast hybrids on  
932 the rise," *Yeast* **39**, 40-54 (2021).
- 933 96 Lahti, D. C., *et al.*, "Relaxed selection in the wild," *Trends in Ecology & Evolution* **24**,  
934 487-496 (2009).
- 935 97 Martínez-Cano, D. J., *et al.*, "Evolution of small prokaryotic genomes," **5**, 742 (2015).
- 936 98 Haase, M. A. B., *et al.*, "Repeated horizontal gene transfer of GALactose metabolism  
937 genes violates Dollo's law of irreversible loss," *Genetics* **217**, iyaa012 (2021).
- 938 99 H Wickham, *ggplot2: elegant graphics for data analysis* (Springer, NY, 2009).

939

940
